# Supplementary material for: Impacts of irrigation on ozone and fine particulate matter (PM 2.5 ) air quality: Implications for emission control strategies for intensively irrigated regions in China
Source: Copernicus journal article supplement (doi:10.5194/egusphere-2024-1557), 2024-08-02
Supplement: Supplementary file 1 [file egusphere-2024-1557-supplement.pdf]

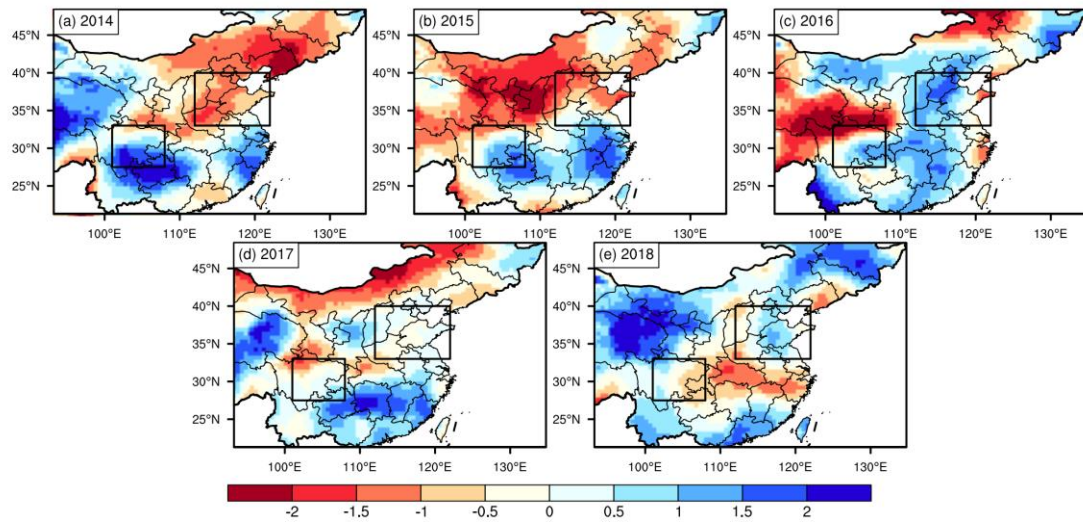

**Figure S1.** Spatial distribution of summertime Standardized Precipitation Evapotranspiration Index (SPEI) with 3-month timescale from 2014 to 2018.

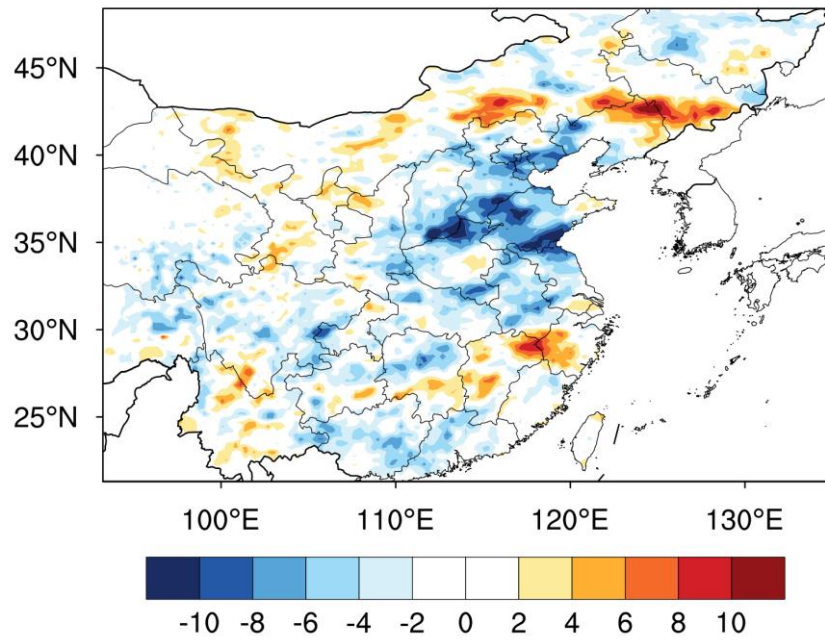

**Figure S2.** Spatial distribution of the change in downward solar radiation ( $\text{W m}^{-2}$ ) in IRR relative to NOIRR.

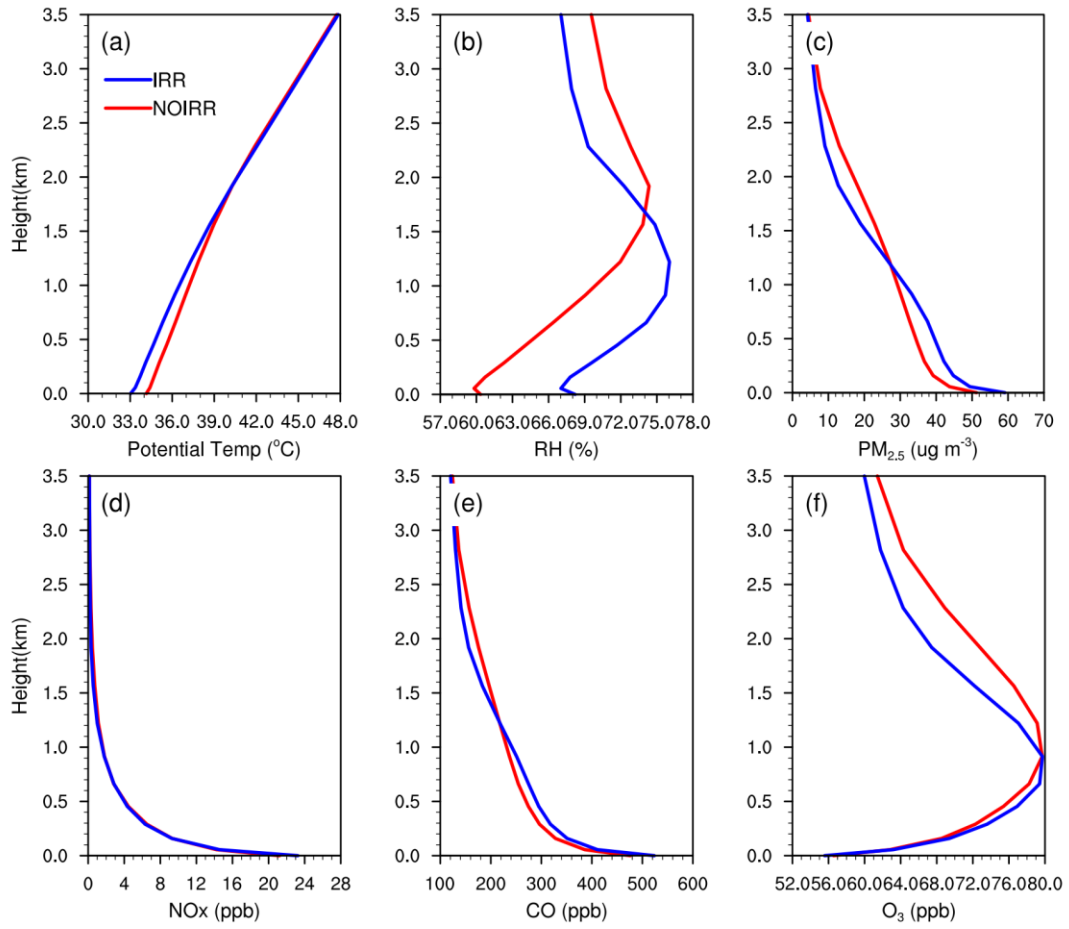

**Figure S3.** Vertical profiles of daily average potential temperature (°C), RH (%), PM<sub>2.5</sub> (µg m<sup>-3</sup>), NO<sub>x</sub> (ppb), CO (ppb) and O<sub>3</sub> (ppb) from IRR (blue lines) and NOIRR (red lines) in Chengdu.

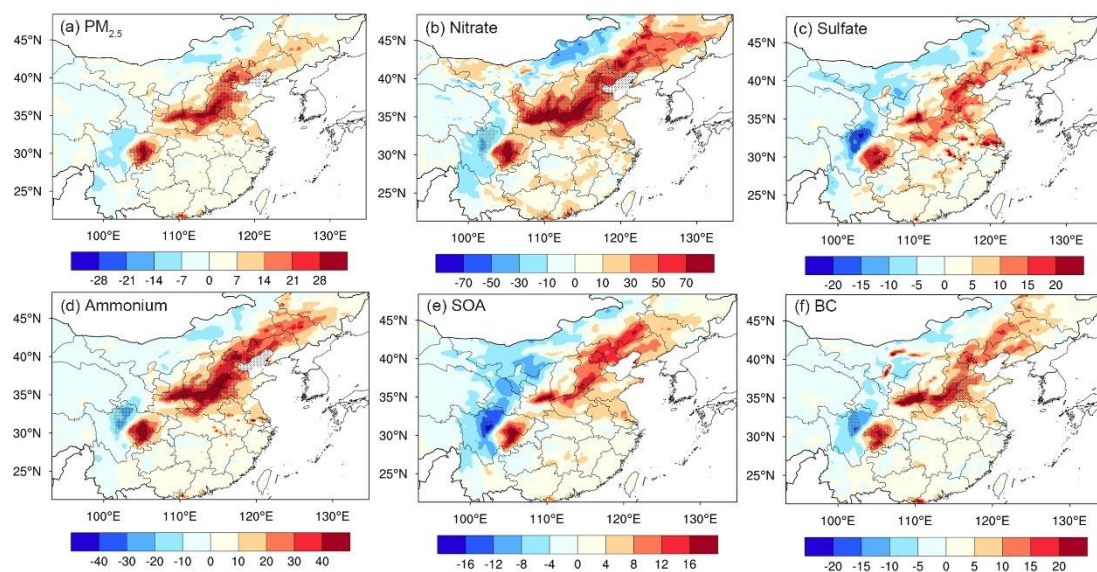

**Figure S4.** Spatial distribution of changes (%) in  $PM_{2.5}$ , nitrate, sulfate, ammonium, SOA and BC in IRR relative to NOIRR during the summer of 2017. Dotted area indicates the changes are statistically significant at 95% confidence level using two-tailed Student's *t*-test.

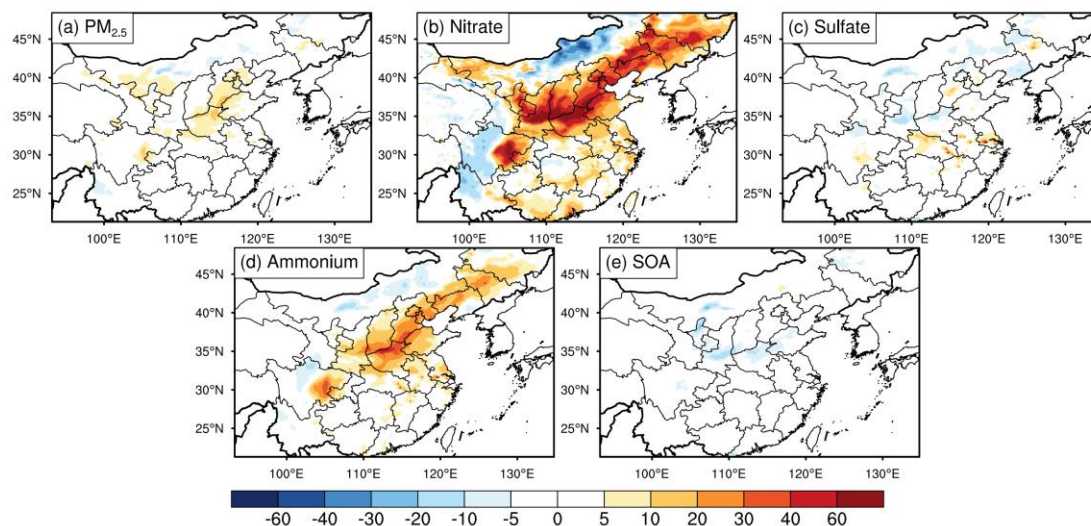

**Figure S5.** Contribution (%) of secondary formation to the increase in (a)  $\text{PM}_{2.5}$  and (b–e) secondary components (nitrate, sulfate, ammonium and SOA). Contributions are calculated by subtracting the fractional changes in BC ( $\Delta\text{BC}$ ) from the fractional changes other secondary  $\text{PM}_{2.5}$  components ( $\Delta\text{PM}_{2.5}$ ), i.e.,  $\Delta\text{PM}_{2.5} - \Delta\text{BC}$ .

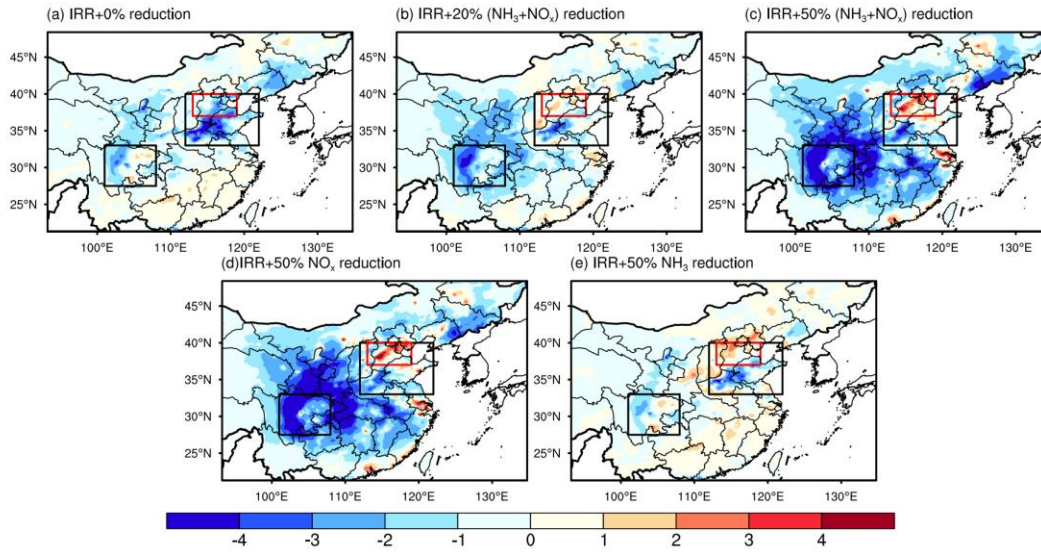

**Figure S6.** Spatial distribution of changes in nighttime ozone (ppb) in (a) IRR, IRR with (b) 20 % and (c) 50 % combined emission reduction of  $\text{NO}_x$  and  $\text{NH}_3$ , 50 % individual emission reduction of (d)  $\text{NO}_x$  and (e)  $\text{NH}_3$ , relative to NOIRR during the summer of 2017. Black squares indicate North China Plain and Sichuan Basin, respectively. Red square is the city cluster of Beijing-Tianjin-Hebei region (BTH).
